# Supplementary material for: Two Different Therapeutic Approaches for SARS-CoV-2 in hiPSCs-Derived Lung Organoids
Source: MDPI journal article supplement (doi:10.3390/cells11071235), 2022-04-05
Supplement: s1 [file s1]

Archive with 1 entries (1 files):
- cells-1577026-SM.pdf
